# Supplementary material
Source: bioRxiv or medRxiv preprint supplement (https://medrxiv.org/highwire/filestream/87172/field_highwire_adjunct_files/0/2020.06.23.20138420-1.pdf)
Supplement: Supplementary file [file 2020.06.23.20138420-1.pdf]

**eFigure I. Participant flow chart**

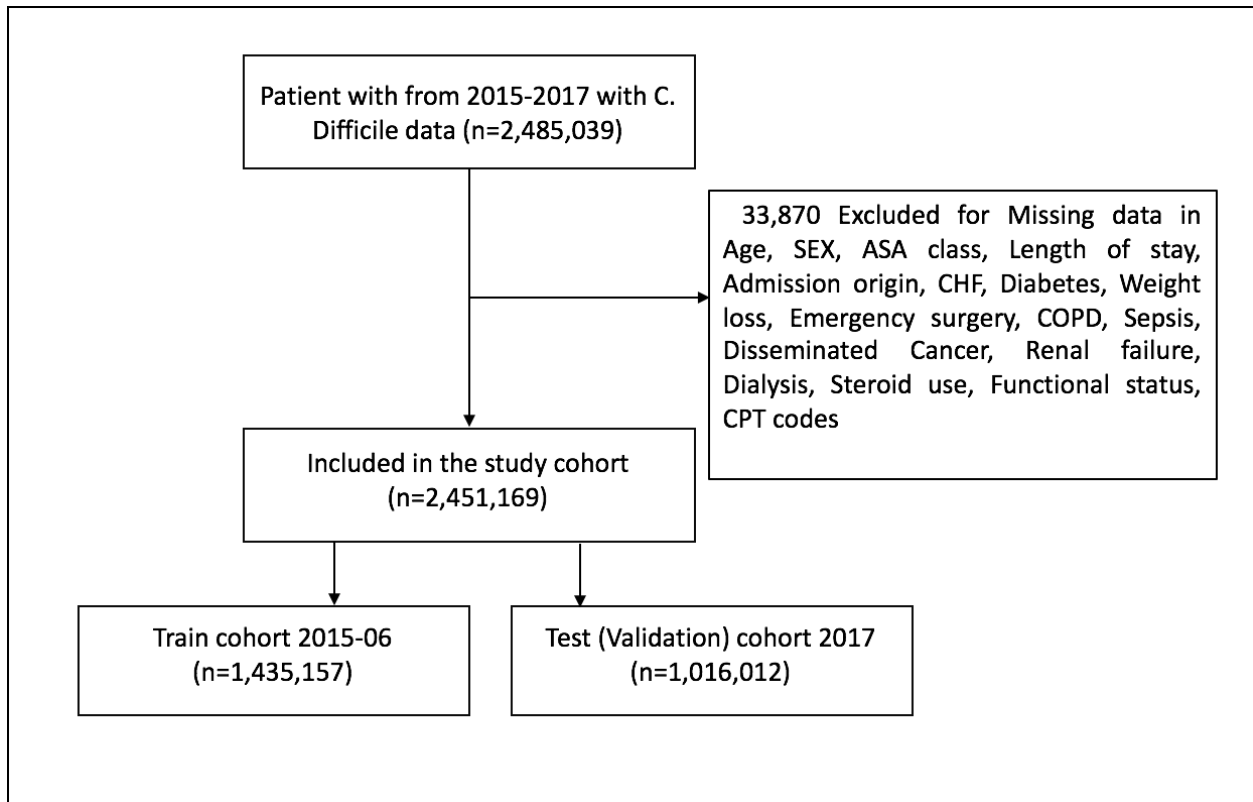

**eFigure II. Calibration plot for postoperative C. difficile infection. Observed vs expected stroke risk**

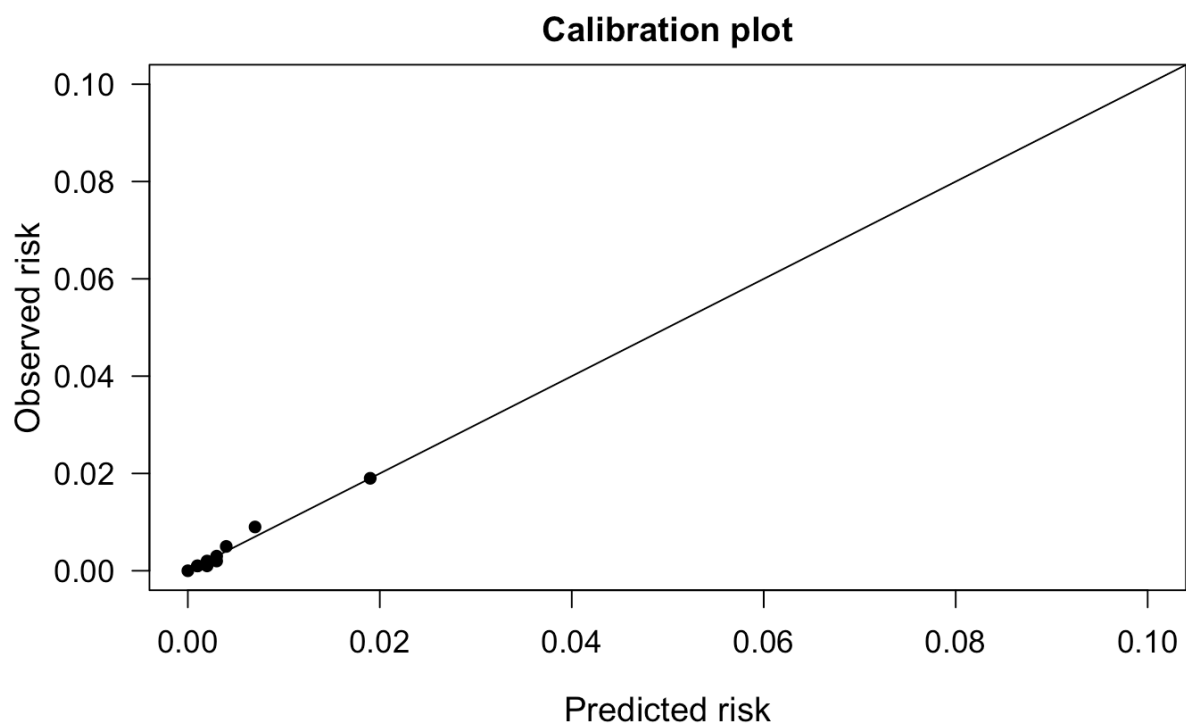

**eFigure III. Mobile web-application of CDI prediction model**

### Prediction Model

## Clostridium Difficile Risk Model

\* 30-day postoperative risk of C. difficile colitis

Age:

History of Insulin Dependent Diabetes:

Weight Loss (>10% loss body weight in last 6 months):

ESRD on dialysis:

Chronic steroid use:

Sepsis prior to surgery:

Leukocytosis, WBC >12(x1000/mcL) :

Hematocrit (<=30%) :

Surgery Type :

### Prediction Model

## Result

**30-day C. Difficile Colitis Risk: 5.79%**

\* C. Difficile Risk: defined by 30-day postoperative occurrence of C. difficile colitis

**eTable I. Adjusted odds ratio of predictors for postoperative C. difficile infection including hospital length of stay**

|                                        | Adjusted Odds ratio (95% CI) | Coefficient | SE    | P value |
|----------------------------------------|------------------------------|-------------|-------|---------|
| Intercept                              |                              | -7.681      | 0.207 | <0.001  |
| Age                                    | 1.022 (1.02-1.024)           | 0.022       | 0.001 | <0.001  |
| Steroid use                            | 1.325 (1.203-1.459)          | 0.282       | 0.049 | <0.001  |
| Weight Loss                            | 1.375 (1.221-1.549)          | 0.318       | 0.061 | <0.001  |
| IDDM                                   | 1.317 (1.212-1.431)          | 0.276       | 0.042 | <0.001  |
| Dialysis                               | 1.735 (1.525-1.974)          | 0.551       | 0.066 | <0.001  |
| Leukocytosis (>12 x10 <sup>9</sup> /l) | 1.279 (1.185-1.38)           | 0.246       | 0.039 | <0.001  |
| Hematocrit <=30%                       | 1.433 (1.329-1.544)          | 0.360       | 0.038 | <0.001  |
| Preoperative Sepsis (reference = No)   |                              |             |       |         |
| SIRS                                   | 1.647 (1.486-1.825)          | 0.499       | 0.052 | <0.001  |
| Sepsis                                 | 1.681 (1.515-1.865)          | 0.519       | 0.053 | <0.001  |
| Septic Shock                           | 1.378 (1.166-1.629)          | 0.321       | 0.085 | <0.001  |
| Surgery type (reference =ENT)          |                              |             |       |         |
| anorectal, appendix                    | 1.979 (1.313-2.982)          | 0.683       | 0.209 | 0.001   |
| Bariatric, stomach, esophagus          | 2.266 (1.504-3.413)          | 0.818       | 0.209 | <0.001  |

|                                                     |                     |        |       |        |
|-----------------------------------------------------|---------------------|--------|-------|--------|
| brain                                               | 1.616 (1.028-2.54)  | 0.480  | 0.231 | 0.037  |
| cardiac                                             | 1.689 (1.025-2.785) | 0.524  | 0.255 | 0.040  |
| Endocrine, thyroid, parathyroid,<br>adrenal, breast | 0.317 (0.199-0.505) | -1.148 | 0.237 | <0.001 |
| Gallbladder, biliary tract                          | 1.391 (0.92-2.105)  | 0.330  | 0.211 | 0.118  |
| Hernia,peritoneum,omentum,<br>diverticulum          | 1.345 (0.897-2.016) | 0.296  | 0.207 | 0.152  |
| Intestine, not rectum                               | 4.196 (2.82-6.244)  | 1.434  | 0.203 | <0.001 |
| Liver, pancreas, spleen                             | 4.415 (2.933-6.644) | 1.485  | 0.209 | <0.001 |
| obgyn                                               | 1.021 (0.671-1.553) | 0.021  | 0.214 | 0.924  |
| Orthopedic, lower extremity, pelvis                 | 1.229 (0.823-1.835) | 0.206  | 0.205 | 0.314  |
| orthopedic upper extremity, shoulder                | 0.397 (0.225-0.7)   | -0.924 | 0.290 | 0.001  |
| Skin, subcutaneous, other<br>musculoskeletal        | 1.446 (0.959-2.18)  | 0.369  | 0.210 | 0.079  |
| spine                                               | 0.816 (0.533-1.248) | -0.204 | 0.217 | 0.347  |
| thoracic_non_esophageal                             | 0.984 (0.605-1.6)   | -0.017 | 0.248 | 0.947  |
| urology                                             | 1.761 (1.17-2.651)  | 0.566  | 0.209 | 0.007  |
| aorta                                               | 3.38 (2.073-5.511)  | 1.218  | 0.249 | <0.001 |
| Vascular                                            | 1.495 (0.994-2.25)  | 0.403  | 0.208 | 0.053  |
| Hospital length of stay                             | 1.045 (1.043-1.046) | 0.044  | 0.001 | <0.001 |
